# Supplementary material
Source: PubMed Central journal article supplement (PMC3282180)

**Table S1: Single allele base extension primers for the *EGFR* exon 19 deletion assay (Sequenom)**

(Supplementary file)

**Figure S1:** LNA increases the sensitivity of the Sequenom EGFR-2573 assay. Mass spectrometry assays with the EGFR-2573 assay were performed on DNAs from the H3255 (EGFR 2573T>G) and H358 (wild-type for EGFR) cell lines. The H3255 DNA was diluted in H358 DNA to 1/10000. **A.** In normal PCR conditions, the sensitivity of the technique is 1%. The G peak is not detected at 1/1000. **B.** By adding LNA at 0.6 $\mu$ M in the first PCR, the sensitivity of the assay increases to 0.1% (at 1/10000, a G peak is still visible but the confidence of the result is low).

Suppl. Fig. 1

**A**

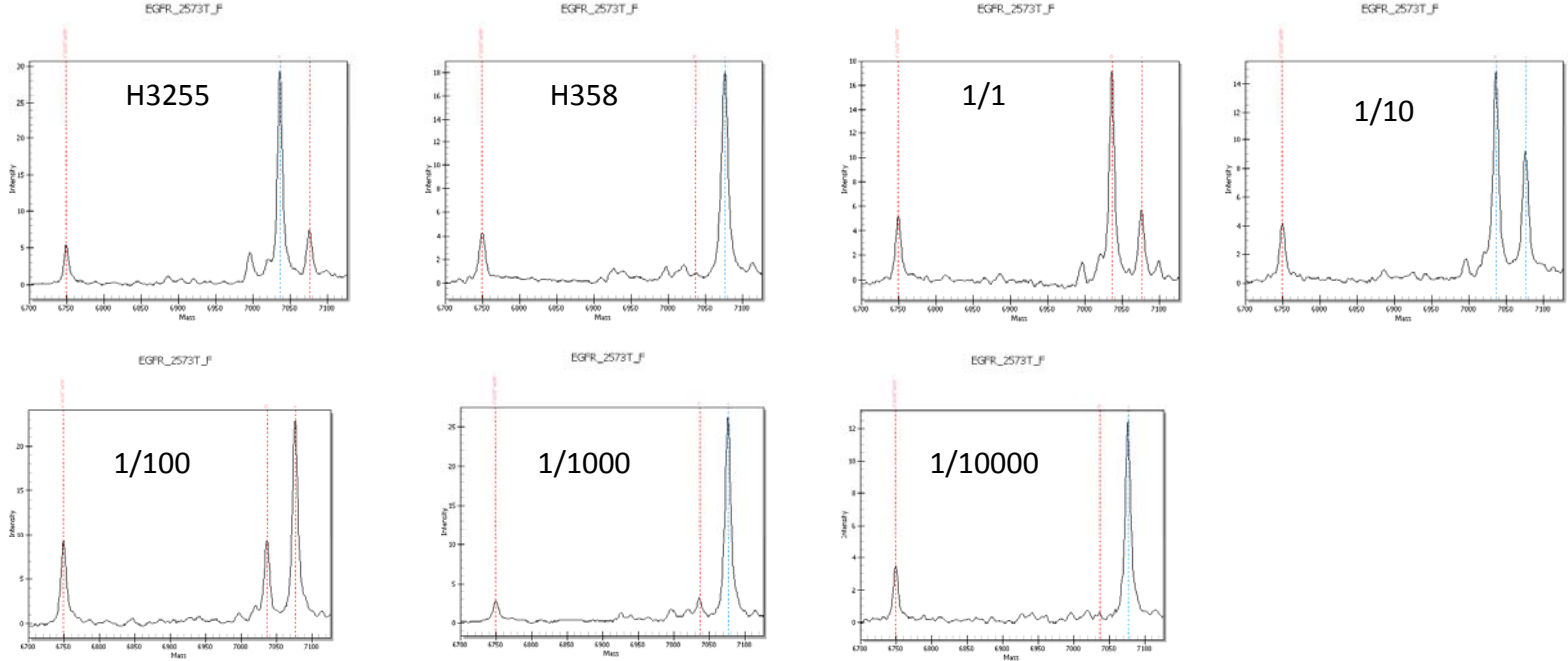

**B**

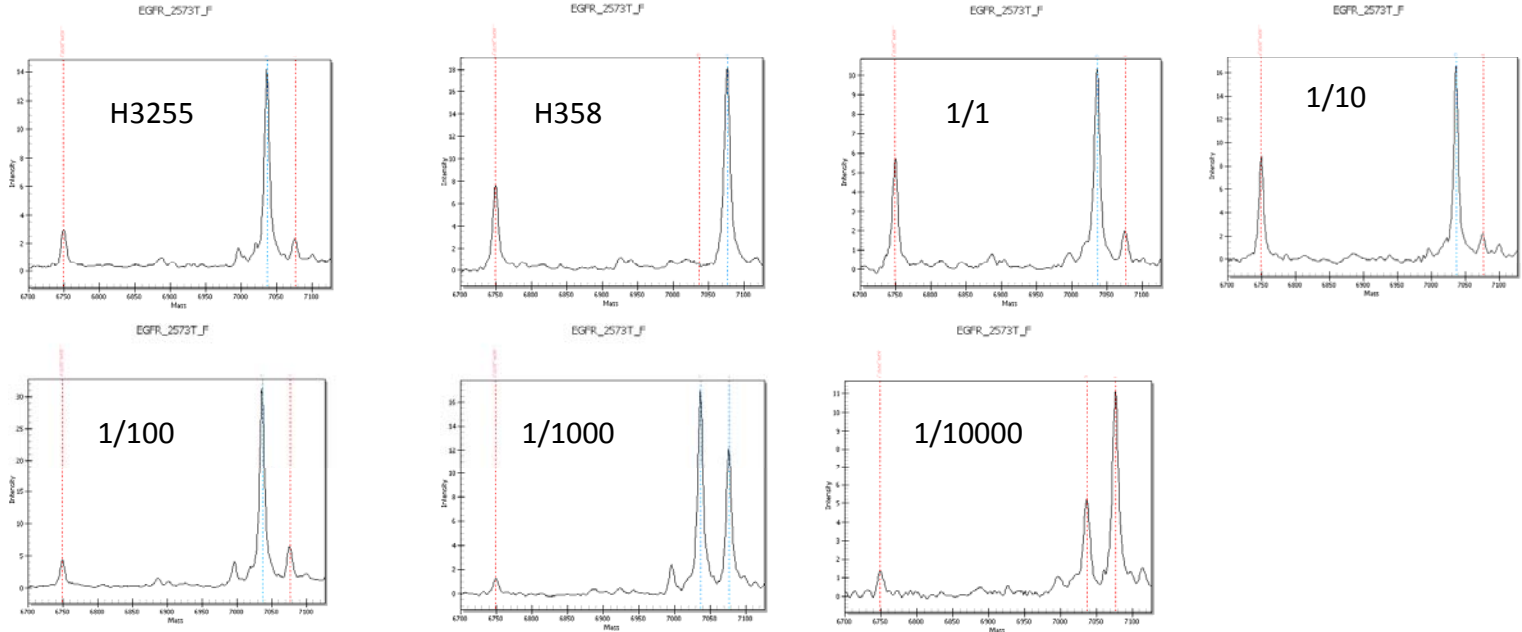

Supplement: NIHMS324655-supplement-01.pdf [file NIHMS324655-supplement-01.pdf]
